# Supplementary material
Source: publisher site journal article supplement (https://www.dovepress.com/article/499355)
Supplement: Supplementary file 1 [file get_supplementary_file.php]

Supplementary Table S1

Univariate analysis of 16 variables potentially associated with one year survival in 3094 patients.

| Variable | Patients survived one year  N=3042 (98.3%) | Patients did not survive one year survive  N=52 (1.7%) | P-value |
| --- | --- | --- | --- |
| Age ≤ 55 years | 1,133 (37.25%) | 3 (5.77%) | 0.000 |
| Male sex | 2365 (77.74%) | 30 (57.69%) | 0.001 |
| BMI < 30 kg/m2 | 1987 (68.9%) | 4 (80%) | 0.592 |
| Physical activity | 155 (33.62%) | 1 (25.00%) | 0.716 |
| Absence of hypertension | 1,075 (35.34%) | 11 (21.15%) | 0.034 |
| Absence of cigarette smoking | 1,764 (57.99%) | 45 (86.54%) | 0.000 |
| Absence of T2D | 1,252 (41.16%) | 19 (36.54%) | 0.502 |
| Absence of family history of pCVD | 1,735 (60.14%) | 3 (60.00%) | 0.995 |
| Absence of CKD | 2,866 (94.21%) | 43 (82.69%) | 0.001 |
| Clinical diagnosis of CAD | 566 (18.61%) | 0 (0.00%) | 0.001 |
| Absence of heart Failure | 2,557 (84.06%) | 30 (57.69%) | 0.000 |
| Absence of metabolic syndrome | 186 (41.33%) | 3 (75.00%) | 0.174 |
| Use of oral antiplatelets agent | 2,969 (97.60%) | 37 (71.15%) | 0.000 |
| Use of statins | 2,847 (93.59%) | 34 (65.38%) | 0.000 |
| Use of RASi | 1,724 (56.67%) | 16 (30.77%) | 0.000 |
| Use of beta blockers | 2,323 (76.39%) | 43 (82.69%) | 0.288 |

BMI: body mass index; CAD: coronary artery disease; CCTA: coronary computed tomography angiography; CKD: chronic kidney disease; pCVD: premature cardiovascular disease; RASi: renin-angiotensin system inhibitors; T2D: type 2 diabetes.
